# Supplementary material for: Translocator Protein 18 kDa (TSPO) Deficiency Inhibits Microglial Activation and Impairs Mitochondrial Function
Source: PubMed Central journal article supplement (PMC7339871; doi:10.3389/fphar.2020.00986), 2020-06-30

# **Translocator protein 18 kDa (TSPO) deficiency inhibits microglial activation and impairs mitochondrial function**

**Running Title: TSPO deficiency inhibits microglial activation**

## **Figure. S1. Detection of TSPO knock out and knock-down efficiency**

(A) Representative images of co-staining for the microglia-specific marker Iba1 (shown in red) and nuclei (stained with DAPI, shown in blue). The 4 groups contained a total of n=340 cells. (B) Western blot analysis of the efficiency of TSPO knockout in primary microglia isolated from TSPO<sup>-/-</sup> mice, with WT mice for comparison. (C) Western blot analysis of TSPO knockdown efficiency after infection with a lentivirus encoding TSPO shRNA versus vector shRNA. Data are expressed as the mean  $\pm$  SEM. \*p<0.05, \*\*p<0.01, \*\*\*p<0.001, one-way ANOVA.

Supplementary figure:

A

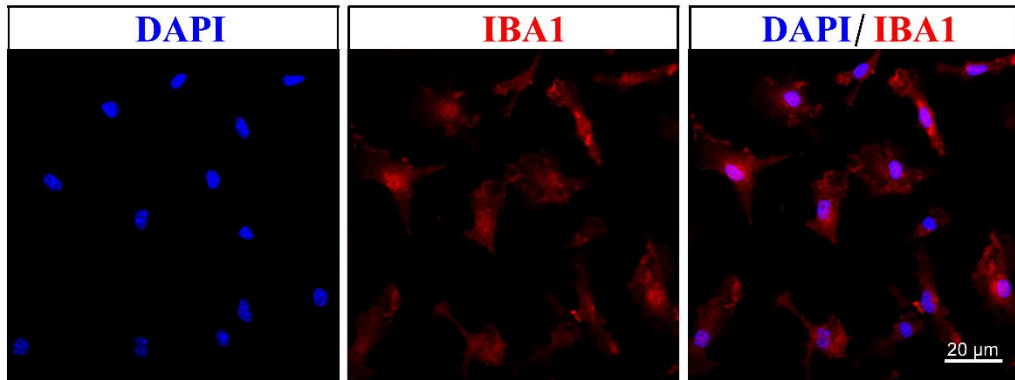

B

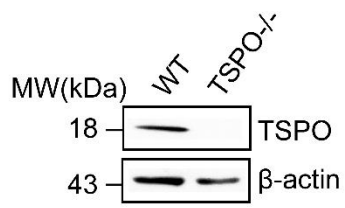

C

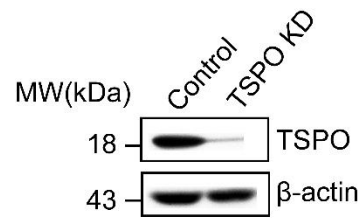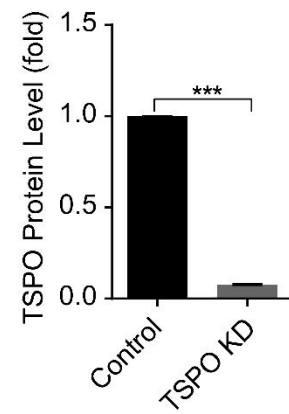

Supplement: Image_1.pdf [file Image_1.pdf]
