# Supplementary material for: Translocator Protein 18 kDa (TSPO) Deficiency Inhibits Microglial Activation and Impairs Mitochondrial Function
Source: PubMed Central journal article supplement (PMC7339871; doi:10.3389/fphar.2020.00986), 2020-06-30
Supplement: Table_1.pdf [file Table_1.pdf]

**Table 1: The primer list for the genes tested in this study.**

| Gene Name            | Types of primer | Sequence                         |
|----------------------|-----------------|----------------------------------|
| Mouse $\beta$ -actin | Forward         | 5'-GGCTGTATTCCCCTCCATCG-3'       |
|                      | Reverse         | 5'-CCAGTTGGTAACAATGCCATGT-3'     |
| Mouse GAPDH          | Forward         | 5'-AGGTCGGTGTGAACGGATTTG-3'      |
|                      | Reverse         | 5'-GGGGTCGTTGATGGCAACA-3'        |
| Mouse TSPO           | Forward         | 5'-GCCTACTTTGTACGTGGCGAG-3'      |
|                      | Reverse         | 5'-ATGGCTGAATACAGTGTTGCC-3'      |
| Mouse IL-1 $\beta$   | Forward         | 5'-TGTAATGAAAGACGGCACACC-3'      |
|                      | Reverse         | 5'-TCTTCTTTGGGTATTGCTTGG-3'      |
| Mouse IL-6           | Forward         | 5'-GCTACCAAACCTGGATATAATCAGGA-3' |
|                      | Reverse         | 5'-CCAGGTAGCTATGGTACTCCAGAA-3'   |
| Mouse iNOS           | Forward         | 5'-GTTCTCAGCCCAACAATACAAGA-3'    |
|                      | Reverse         | 5'-GTGGACGGGTCGATGTCAC-3'        |
| Mouse TNF- $\alpha$  | Forward         | 5'-CAGGCGGTGCCTATGTCTC-3'        |
|                      | Reverse         | 5'-CGATCACCCCGAAGTTCAGTAG-3'     |
| Mouse Arg-1          | Forward         | 5'-CTCCAAGCCAAAGTCCTTAGAG-3'     |
|                      | Reverse         | 5'-AGGAGCTGTCATTAGGGACATC-3'     |
| Mouse CD206          | Forward         | 5'-CTCTGTTTCAGCTATTGGACGC-3'     |
|                      | Reverse         | 5'-CGGAATTTCTGGGATTCAGCTTC-3'    |
| Mouse Non-numt       | Forward         | 5'-CTAGAAACCCCGAAACCAA-3'        |
|                      | Reverse         | 5'-CCAGCTATCACCAAGCTCGT-3'       |
| Mouse B2m            | Forward         | 5'-ATGGGAAGCCGAACATACTG-3'       |
|                      | Reverse         | 5'-CAGTCTCAGTGGGGGTGAAT-3'       |
